# Supplementary material
Source: PubMed Central journal article supplement (PMC7002201)
Supplement: NIHMS1546352-supplement-1.pdf [file NIHMS1546352-supplement-1.pdf]

Supplemental Table I: List of sequences used for the studied of MHC class I lineages in cartilaginous fish

| Sample       | Common Name              | Specie                        | Nucleotide Accession Number | Protein Accession Number |
|--------------|--------------------------|-------------------------------|-----------------------------|--------------------------|
| Gici-UAA     | nurse shark              | <i>Ginglimostoma cirratum</i> | AF220063                    | AAF66110                 |
| Gici-UAA-NC1 | nurse shark              | <i>Ginglimostoma cirratum</i> | AF357922                    | AAL59854                 |
| Trsc-UAA     | banded houndshark        | <i>Triakis scyllia</i>        | AF034351                    | AAB97352                 |
| Sqac-UAA     | spiny dogfish            | <i>Squalus acanthias</i>      | AY150811                    | AAN77874                 |
| Hefr-UAA     | horn shark               | <i>Heterodontus francisci</i> | AF028559                    | AAC60349                 |
| Raeg-UAA     | clearnose skate          | <i>Raja eglanteria</i>        | KC335152                    | AGH32767                 |
| Rhpr-UAA     | shovelnose guitarfish    | <i>Rhinobatos productus</i>   | KC469286                    | AGJ01148                 |
| Hefr-UBA     | horn shark               | <i>Heterodontus francisci</i> | AF028558                    | AAC60348                 |
| Rhty-UBA     | whale shark              | <i>Rhincodon typus</i>        | XM_020536967                | XP_020392556             |
| Gici-UBA     | nurse shark              | <i>Ginglimostoma cirratum</i> | AF028557                    | AAC60347                 |
| Xela-UAA     | african clawed frog      | <i>Xenopus laevis</i>         | L20733                      | AAA16064                 |
| Cami-UAA     | elephant shark           | <i>Callorhynchus milii</i>    | JW872001                    | AFP04519                 |
| Gaga-BF2     | chicken                  | <i>Gallus gallus</i>          | NM_001031338                | NP_001026509             |
| Gaga-BF1     | chicken                  | <i>Gallus gallus</i>          | NM_001044683                | NP_001038148             |
| MumuH2D      | mouse                    | <i>Mus musculus</i>           | M23444                      | AAA39567                 |
| Hosa-HLA-E   | human                    | <i>Homo sapiens</i>           | NM_005516                   | NP_005507                |
| HosaHLA-A    | human                    | <i>Homo sapiens</i>           | U18930                      | AAA87076                 |
| Lach         | coelacanth               | <i>Latimeria chalumnae</i>    | NW_005819663                | XP_014346882             |
| Pran         | lungfish                 | <i>Protopterus annectens</i>  | GQ485578                    | ACV87433                 |
| Acsi         | chinese sturgeon         | <i>Acipenser sinensis</i>     | GQ485582                    | ACV87437                 |
| Leoc         | spotted gar              | <i>Lepisosteus oculatus</i>   | XM_015339735                | XP_015195221             |
| Gaac-U       | stickleback              | <i>Gasterosteus aculeatus</i> | nd                          | ENSGACG00000001937       |
| Taru-U       | fugu                     | <i>Takifugu rubripes</i>      | NM_001032690                | NP001027862              |
| Orni-U       | tilapia                  | <i>Oreochromis niloticus</i>  | XM_019355577                | XP_019211122             |
| Orla-U       | medaka                   | <i>Oryzias latipes</i>        | AB450991                    | BAJ07290                 |
| Cami-UDA     | elephant shark           | <i>Callorhynchus milii</i>    | JW870817                    | AFP03335                 |
| Leer-UDA     | little skate             | <i>Leucoraja erinacea</i>     | LS-transcriptB2-ctg40765*   | nd                       |
| Rhty-UDA     | whale shark              | <i>Rhincodon typus</i>        | XM_020510579                | XP_020366168             |
| Gici-UDA     | nurse shark              | <i>Ginglimostoma cirratum</i> | MN339476                    | nd                       |
| Prgl-UDA     | blue shark               | <i>Prionace glauca</i>        | GFYY01095694                | nd                       |
| Scca-UDA     | smaller spotted catshark | <i>Scyliorhinus canicula</i>  | SSC-transcript-ctg67577*    | nd                       |
| Leoc-Z       | spotted gar              | <i>Lepisosteus oculatus</i>   | GFIM01040660                | nd                       |
| Teni-Z       | tetraodon                | <i>Tetraodon nigroviridis</i> | nd                          | CAF90807                 |
| Dare-Z       | zebra fish               | <i>Danio rerio</i>            | KC607850                    | AHA37389                 |
| Sqac-UCA     | spiny dogfish            | <i>Squalus acanthias</i>      | AF515705                    | AAN78091                 |
| Hosa-CD1     | human                    | <i>Homo sapiens</i>           | M28826                      | AAA51939                 |
| Gaga-CD1     | chicken                  | <i>Gallus gallus</i>          | AY849319                    | AAX49405                 |

\*The sequences are obtained from skate database (<http://skatebase.org/>). The remaining sequences are obtained from NCBI (<https://www.ncbi.nlm.nih.gov/>); nd meaning no data



**α3 domain**

nurse shark Gici UAA VKPSVTFSTVRGN-----KQLSCVATGFPYHSIEVNLFRDSAKIDETE---STGVRPNHDGSIYHRSTFEDP---NSQAKYSCVVD---HDGLGQQ-LVVFY  
nurse shark Gici UAA-NC1 .....D.....G.....N.AG.....V.WM.....T.....T.....S.....  
banded houndshark Trsc UAA AA.T.S..RLGDS---K.....Q.....LKH.H..Q.AA.VFY---S.....T.MEKQ.D.E---SDP.F.E.....A.S.H.....  
spiny dogfish Sqac UAA A.R.FPSVKNKASNR-TE..LV...RD...T.L.NGQP.TD.---.IL.....T.LT.WAQITL---DEG.T...QY.Q---G.KV.VE-IRHWD  
horn shark HeFr UAA A.S..RRGDS---NR.....T.....QA...T.R.R.GVSL..SH---FD.IL.....T.T.KW.DI...---AD..F.E.....S.REK-M...  
clearnose skate Raeg UAA LE.E.SIFLSADG---RRV..FT.....R.....V..GLVL.SR---H.TL.....TF.QR.WADVE---GDTTPLL.R.E---P..SEP..E.L.L  
shovelnose guitarfish Rhpr UAA NP.E.S..ASKDG---RR.....Q.....D.TLTL.GRTLE.H---Q.IL...ENT..QT.TVMVE---TD..L.R.E---R.LEP-M..L.L  
horn shark HeFr UBA A.V.S..RFGDS---NR.....V.....QA...T.W.GVM..IL---S.IL.....RT..RKWI.....ED.E...R.E---S.TEM-M..I.I  
whale shark Rhty UBA LS...APIVSTRLGDS-N...LI...QA...T.W.GVL...L---.IL.Y.RT..RKWI.....ED.E...R.E---S.EEK...I.I  
nurse shark Gici UBA .A.T.S..HLGDT---N...LV...QA...T.W.GVV..L---.IL.....RT..RKWI.....ED.E...YME---I.EAK---I.I  
african clawed frog Xela UAA H.H.R.TSDHQADAT---E.R.Q.Y...RE.D.KWVRKNGDDVHS.A--AKEIL.P...LRVTA.IT...EGDS.A.H.E---S.NEK-I.V.W  
elephant shark Cami UAA R.E..L.S.P..S---R...L.....RA...K.LKNGQILSDE---S.TS..Q.T.LRK.V.IN---TATET..Q.E---SS.TTP-FT.V  
chicken Gaga BF2 ER.E.R.VWVKRKAEDGT---LT...R.H...RP.V.SWLK.G.VRGQDAQ---G.IV..G.T.HTWVITDAQ---GDGD..Q.R.E---AS.P.P-GLYSV  
chicken Gaga BF1 ER.E.R.VWVKRKAEDGT---LT...R.H...RP.V.SWLK.G.VRGQDAQ---G.IV..G.T.HTWVITDAQ---GDGD..Q.R.E---AS.P.P-GLYSV  
human Hosa HLA-E ER.E.R.VWVKRKAEDGT---LT...R.H...RP.V.SWLK.G.VRGQDAQ---G.IV..G.T.HTWVITDAQ---GDGD..Q.R.E---AS.P.P-GLYSV  
human Hosa HLA-A2 DA.KTHM.HHVASDHEA-TL-R.W.L.S...AE.TLTWQ..GETQTDTE--LVET..AG..TF.KWAAVVVPS---GGEQR.T.H.Q---E..PKP..TLRW  
coelacanth Lach U R.Q.KLSDRP.SEKNS-IV.T.MV...H.RA.D.TWI..GETRMDNAH--TD.IL.E.T...KTTI.IGS---DDKRS.A.E...GS.NPK-N.VW  
lungfish Fran U P.A..LLQRKARGAD-TEVL.HV...F.RAV..T.WV..GQDQL.EGVQ-NGE.L.L.Q..TF.LRKILTVS--BEQGRHS...Q...ISFTEK-QNYIW  
chinese sturgeon Acsci U P.A..LLQRKARGAD-TEVL.HV...F.RAV..T.WV..GQDQL.EGVQ-NGE.L.L.Q..TF.LRKILTVS--BEQGRHS...Q...ISD.K-I.KEW  
spotted gar Leoc U ER.Q.SVY.RVSSSQGP-EV-T.L...F.KD.V.H.Q..GQDLQ.DWH--GE.L.L.G...F.VRK.LAVSE-BELRHQ...R.QEPR.IMGSS-ARGT  
stickleback Gaac U ER...SLLQKTPS---SPV..H.....RAALRWK.GEELH.DVD--LGEIL.....TF.MRVDLKLSVPAEDWRH.D.FQ---LS.VDED-I.KL  
fugu Taru U EL...SLLQKTPS---SPV..H.....DRATLSWRKGEELH.DVD--HGEMLL.P..TF.MSVDLKVSSVPEDWSK.K.FQ---LS.AKEI-TTLD  
tilapia Orni U L.L..SLLQKSSS---SSVT.H.....NRA.MVWK.GVELH.GVD--KGEILT.N..TF.MSVDLKVSSVPEDWRH.R.FQ---LS.VDED-I.TRL  
medaka Ori U L.L..SLLQKSSS---SAV..H.....DRA.LLWR..GEE.H.GVE--KQIL..N..TF.MSVDLQPPS--GEMDQR.E.FQ---LS.KNEI-VIKL  
elephant shark Cami UDA ...K..VRALKMNSLG-HR.A.LV...TRDV.TWRHEQDVP..T--N..I.I...ST...TSYDHTS---FH.KDT.C.H.Q---SFPFEG-KT.VC  
little skate Leer UDA AV.D.WY.R.SPDSQK-RV.H.L...F.P.T.NMSW...GRSVAANK--NS..L...T.MRV.LTE---AERREHV.R.W---SSRPEG-M..VW  
whale shark Rhty UDA AV.EANYYTIN.HN---VN.H.LV...K..N.TW.A.GKVPD.H---.IL...T...RVIFQIEH---DDGRN.V.RIE---SS.PAP-KE.LW  
nurse shark Gici UDA AV.EANYYTIN.HN---VN.H.LV...Q..N.TW.A.GKVPD.H---.IL...T...RVIFQIER---DDGRN.V.RIE---SS.PAP-KE.LW  
blue shark Prgl UDA V.E.YYYHTKSSDQQN-LNVH.HV...H.RA.N.SWY..GEPL.SPQ---.IL...TH..RIHFQTKA---GDGRS.V.H.Q---SS.PE..ETPW  
spotted catshark Scca UDA D.D.IVYHTKTLGDQN-VNVH.LV...E.A.N.SWY..GALERPO---.IL...T.TRIYF.TKA---GDSRSHV.H.Q---SS.PFGL-KKPW  
spotted gar Leoc Z P.D.HMFAK.SLTPGQ-LT.T.L...PDVQ.D.Y..GVMLL.KDRVL.S...GAEEYTLQRLKLSLEI-RETDKRS..E.K---SS.KEP-V.RQW  
tetraodon Teni Z P.A.YAL.REA.VKAN-IV.T.M...SSNTI.QIK..GLVTKDD---GD...G.T.KRDQV.IPK---SQKS.T.E.I---ESS.LH-IRKW  
zebra fish Dare Z SR.D.HVFAKIIISGAKLK.T.MV...KDVILTIRKYRTALSDN.VE--S...P.T.LRK..NIYE---K.E.D.Y.A---RT.KEP-IIRKW  
spiny dogfish Sqac UCA SP.V.YYFDRKRPLDSS-VAV..LV...RF...VWQ.NEDFVSGV...P.LL...T...KITLLAA---EDE.E.W.H.T---SS.SET-OTEPW  
human Hosa CD1 ...EAWLS.GPSPGPR-L..V.HVS...KPMW.MM.GEQEQG.Q---LGDIL..ANWTYLRATLDVAD---GEA.GL.R.K---SS.EG.DILLYW  
chicken Gaga CD1 P.MAVVFARTAQAQ--LL.V.RV.S...RP.A.TM.L.GREVPSPALSTGT.L.A.LT..LRSLTLLV---QDGHG.A.R.Q---CS.DRS.L.PW

200 220 240 260

**Connecting/Transmembrane domain**

nurse shark Gici UAA EPKTSMLPVIIIGVVVVIVLVIIVIAVGVVWY  
nurse shark Gici UAA-NC1 EPKTSMLPVIIIGVVVLLQARRLATIQKLLM  
banded houndshark Trsc UAA EPKADSMPLVIIIGVIAVLVLAVALAVGVVLY  
spiny dogfish Sqac UAA GTFPSPGEGTNLGLIVGIVGAVALIALVIGAVW  
horn shark HeFr UAA ERKSSDLPPIIVGVVLAVALVIAVGVVY  
clearnose skate Raeg UAA VRKSSGVMIIVLVLVLAVALAVGVVY  
shovelnose guitarfish Rhpr UAA DKSNSPTIWIIVAVLVLVSVIIVAVGVY  
horn shark HeFr UBA AGLKSDSQIPVTVGVVIVLGLLIVLIVAVAVY  
whale shark Rhty UBA DTKSHSQVPTVIVLGLVGLIIVALVAVGAVKI  
nurse shark Gici UBA DPKSHSQVPTLGIIVFVIGVIGIIAIVAVGAVIY  
african clawed frog Xela UAA PGNKDQNMGMIIIAIAVAVALLVIAVAVGAFY  
elephant shark Cami UAA TGPEVGGPPTLIIIVVVIVLIVAAIIGFVLY  
chicken Gaga BF2 EFPQNLVPIVAGVAVAIAIVVGVGFIIY  
chicken Gaga BF1 EFPQNLVPIVAGVAVAIAIVVGVGFIIY  
human Hosa HLA-E KPASQPTPIVGIAGVLLGVSVGVAAVAV  
human Hosa HLA-A2 EPSSQPTPIVGIAGVLLFVAVITGAVAAV  
coelacanth Lach U APPSGNMVIIIAVIVVVLVLAVALVAVV  
lungfish Fran U VPESGPGIIGVIVGVVLAVALAVIIGVVI  
chinese sturgeon Acsci U DPNMRSDDVPESSSPIGLIAGVIVGVLAVALVIAVGVV  
spotted gar Leoc U PGSDRSSNTAVSCGLTQTITQKAGVGRV  
stickleback Gaac U KDKTRNREKPADSTAVAVLVVIAAVVFP  
fugu Taru U KNGIRTNWKPAGVVRDGEPPSNVIAAVALVLAVALVAVGFLY  
tilapia Orni U DKSEIRTNWGNLSLITVWVAVVLAVALVIAVAFIIY  
medaka Ori U EKAKIRTNWEDSSQMLIIIGVLAVALVIAVLSAFIY  
elephant shark Cami UDA RDAVLWTFGKIATLVCVGLLIVISIVALVFI  
little skate Leer UDA DQGRVPIVWLIPATLILLLCTLGVVYFL  
whale shark Rhty UDA EKGGVVPVIVGICILLLLLIFCIGAVVY  
nurse shark Gici UDA EKGGVVPVIVGICILLLLLIFCIGAVVY  
blue shark Prgl UDA VQSDYAMIVGVVVLVILLAGCVGAFVY  
spotted catshark Scca UDA VKGGRAGLIIGVVVMIILAFVAAAVIY  
spotted gar Leoc Z ERTVWVPPASPPSNLPIVVSVLLVVALVAVGAALAFFA  
tetraodon Teni Z DTDEGNTAVVGVAVGVVVLVIGIGLY  
zebra fish Dare Z DGECQDCSSGTPIGTIFGALIGVLLVAVIGGAVVFLA  
spiny dogfish Sqac UCA VPERSPTRVGVIAAGILGIVAVVCTVTRICT  
human Hosa CD1 RNPTSIGSVLAIIVPSLLLLCLALWY  
chicken Gaga CD1 EDSKWLSAGLALLLAAAVALV

280 300

**Cytoplasmic tail**

nurse shark Gici UAA ---K---AGQKTGYNPAKTSKDKGSSSSSLATA  
nurse shark Gici UAA-NC1 ----GTPPQ-APLPLRGRVCGSCLK  
banded houndshark Trsc UAA ---R..-.....AE...N.S...  
spiny dogfish Sqac UAA -----R.R---.E.KSGYNPANPAERGE...NSSAQA  
horn shark HeFr UAA .....E.....R.E...N.S.N.  
clearnose skate Raeg UAA --HW.TR--PAG.S...T...ERRKK.N.S.P.  
shovelnose guitarfish Rhpr UAA --KK.AGCFSGAKN...T...E...N.S...  
horn shark HeFr UBA ---R.--VTGTS...T...E...N.S.N.  
whale shark Rhty UBA ---G.--G.V.NN.S.TWC--LT-IQT.RHLC  
nurse shark Gici UBA ---C.H.DEVWVTVWCLGHG.MASN...EYIRNGLNSAIIKCVCSGE  
african clawed frog Xela UAA ---R-AGKEDA..TA.ANR.SPP...IV.A  
elephant shark Cami UAA -----.GGK---.T...QACNTM-D...NNSNPPA  
chicken Gaga BF2 ---RRH-AGKKGK...I.PDREG.S...TGSNPSI  
chicken Gaga BF1 ---RRH-AGKKGK...I.PDREG.S...TGSNPSI  
human Hosa HLA-E --IWR..SSG.KGGS.SK.EW..SAQG.-E.HSL  
human Hosa HLA-A2 --MWRR.SSDRKGGS.SQ.AS..SAQG.DV..TACKV  
coelacanth Lach U --MW...---NGG-.SQ.Q.KESSS-DT..DT.PPKV  
lungfish Fran U ---W..-Q-G.AQKN.T.Q.NEGS-DT..DTAP  
chinese sturgeon Acsci U ---W..RQ-G.AQKN.T.Q.NEGS-DT..DTAP  
spotted gar Leoc U --FRAAR---FPV..PCHRLDPGRPT.CVYKDKK.C  
stickleback Gaac U --KVHR.R--NA.RSSAK.SSS.SAS-TD-G.EV.EEINPKP  
fugu Taru U ---R...-GKCTKPKGHSEVKEPLKPNP  
tilapia Orni U KKRTD.R-PPSPAENREVKEQMLPQAEETN.S.HNNREDVSAHSSP  
medaka Ori U KKKNA.R-PPSPVDNKEIQEQL-QPE-NP.A  
elephant shark Cami UDA ---WR.R--YRLRSLCKNTG.EQSS...G.SQESLPLQEFDKLMTSPDSSSTSSSSCVQF  
little skate Leer UDA ---W.NGSGVVKCCSFDKGS.EIENS...G  
whale shark Rhty UDA ---C.H.DEVWVTVWCLGHG.MASN...EYIRNGLNSAIIKCVCSGE  
nurse shark Gici UDA ---W.H.DEVWVTVWCLGHG.MASN...EYIRNGLNSAIIKCVCSGE  
blue shark Prgl UDA ---W.Q.MGSCQCDPFGSVDVSTTG..N..QISSEKIEVEIDRNLLSPGTHSSQNRMTVQEFLLSTPDPGCPRE  
spotted catshark Scca UDA ---DWTNR-QLMK.KFYGLCCGGS-V..G..TSSGSGFVTSSEIIGKSVSPSEKANEAEAGDPLMSGSSSSNSASENVQPLVQHPEMGLPRDQAVEMA  
spotted gar Leoc Z ---HRR.K---ASGSDSSG.P-R..D..DLQNTKGTISNNGVSVPLISNGGQTPQNGGLIPEGVFPVLPV  
tetraodon Teni Z ---MAV..FF---IRKADTSKLL-ASIQVV.PV.TALLPGQASGSSSEDSLVSGEDHQGQKQKHG  
zebra fish Dare Z ----NTRMGWRNAL  
spiny dogfish Sqac UCA ---R..T---AQDQQTQQQPALLIDV..RPMEQPKETGGPSGLLPQPIGV  
human Hosa CD1 --MRRRSYQNI  
chicken Gaga CD1 --RRYR.RQRVDEVRST.LAEHRGTARDGTAAGQYGGCDRETPEDEGRGHI

320 340

Supplemental Figure 2. Amino acid alignment of α3 domain, connecting piece, transmembrane domain, and cytoplasmic tail of MHC class I lineages in cartilaginous fish and other representative vertebrates. Due to the high content of Val and Ile, the connecting piece and transmembrane domain was not aligned. All the designations in this alignment are the same as in supplemental figure 1.
